# Supplementary material for: Adjustable metal particle grid formed through upward directed solid-state dewetting using silicon nanowires
Source: Royal Society of Chemistry journal article supplement (doi:10.1039/d0na00567c), 2020-01-01
Supplement: d0na00567c1.pdf [file d0na00567c1.pdf]

Supporting Information

# Adjustable metal particle grid formed through upward directed solid-state dewetting using silicon nanowires

*Stephan M. Wallace<sup>†,‡\*</sup>, Wipakorn Jevasuwan<sup>†</sup>, Naoki Fukata<sup>†,‡\*</sup>*

<sup>†</sup> International Center for Materials Nanoarchitectonics, National Institute for Materials  
Science,  
Tsukuba, 305-0044, Japan

<sup>‡</sup> Graduate School of Pure and Applied Sciences, University of Tsukuba, Tsukuba, 305-8573,  
Japan

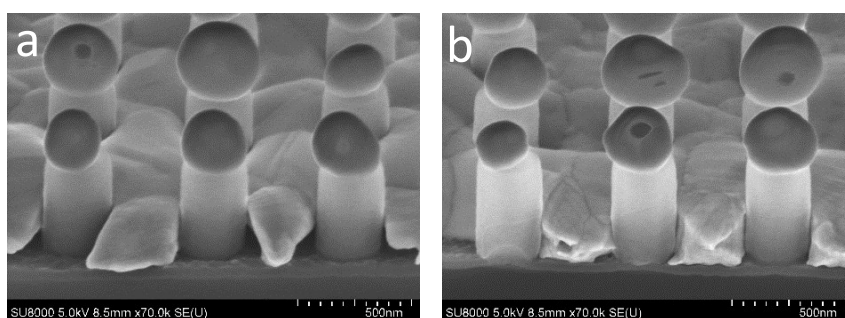

**Figure S1. Sample orientation experiment.** 200 nm<sub>planar</sub> Ag deposited on the same size SiNWs annealed at the same temperature while the sample was oriented **(a)** up-side-up **(b)** up-side-down. No significant difference in particle formation was discernable.

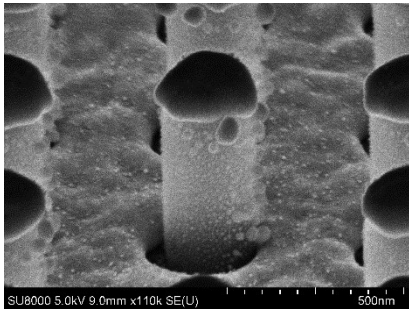

**Figure S2. Thermal Evaporation Experiment.** 63nm<sub>planar</sub> Au metal deposited on SiNWs and annealed at 800 °C for 2.5 minutes. The perpendicular deposition angle forms small particles on the SiNW sides which remain mostly stationary.

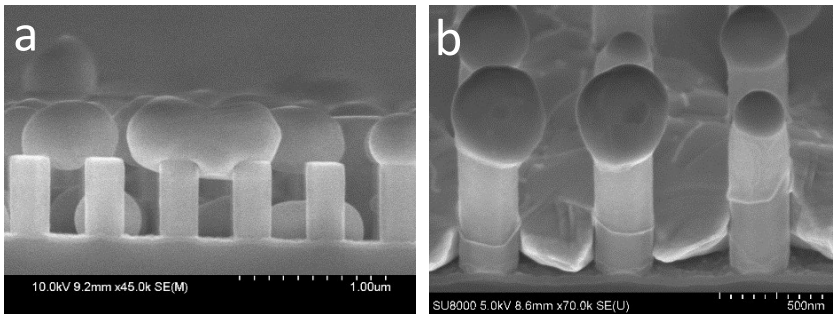

**Figure S3. Examples of irregularities caused by overly high temperature annealing.** (a) 200 nm<sub>planar</sub> Ag annealed at 900 °C shows a large number of the metal particles converging and stretching over multiple SiNWs. (b) 250 nm<sub>planar</sub> Ag annealed at 900 °C showing visible deformation of the SiO<sub>2</sub> near the NW base caused by the metal at high temperature.

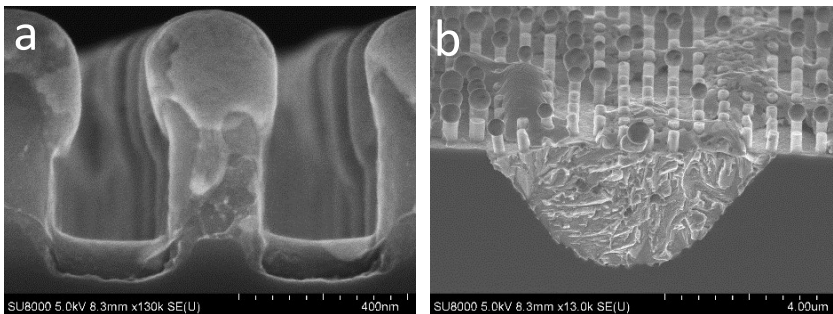

**Figure S4. Examples of damaged caused by reactive substrate material.** (a) Au on Si formed alloy films on the NWs and gold particle surface (b) Cu, Ag alloy on thin SiO<sub>2</sub> was able to quickly penetrate the oxide layer and etch into the silicon substrate.
